# Supplementary material for: Avian influenza surveillance in domestic waterfowl and environment of live bird markets in Bangladesh, 2007–2012
Source: PubMed Central journal article supplement (PMC6010472; doi:10.1038/s41598-018-27515-w), 2018-06-20
Supplement: 41598_2018_27515_MOESM1_ESM.pdf [file 41598_2018_27515_MOESM1_ESM.pdf]

# APPENDIX

Avian influenza surveillance in domestic waterfowl and environment of live bird markets  
in Bangladesh, 2007-2012

Salah Uddin Khan, Emily S. Gurley, Nancy Gerloff, Md Z. Rahman, Natosha Simpson,  
Mustafizur Rahman, Najmul Haider, Sukanta Chowdhury, Amanda Balish, Rashid Uz  
Zaman, Sharifa Nasreen, Bidhan Chandra Das, Eduardo Azziz-Baumgartner, Katharine  
Sturm-Ramirez, C. Todd Davis, Ruben O Donis, Stephen P. Luby

## CONTENTS

1. **Appendix - Figure 1** - Location for the four rural and an urban live bird markets for avian influenza surveillance in Bangladesh from 2007 to 2012. Duration of the site specific surveillance, surveillance type, and Influenza A and H5 prevalence from the waterfowl and environmental were illustrated in the map
2. **Appendix – Figure 2:** Location for the four rural and an urban live bird markets for avian influenza surveillance in Bangladesh from 2007 to 2012. Influenza A and H5 prevalence from the waterfowl samples and the locations of H5N1 outbreaks reported to World Organization of Animal Health, 2007-2013.
3. **STL analysis** – Additional information on methods
4. **Appendix - Figure 3:** The disintegrating results of influenza A virus occurrence by STL method. The filtering procedure was applied to decompose monthly influenza A occurrence time series data in to trends, seasonal and remainder components by using a weighted polynomial regression
5. **Appendix - Figure 4:** The disintegrating results of influenza A/H5N1 virus occurrence by STL method. The filtering procedure was applied to decompose monthly influenza A/H5N1 occurrence time series data in to trends, seasonal and remainder components by using a weighted polynomial regression
6. **Appendix - Table 1:** A list of the influenza A viruses (N=191) detected through live bird market waterfowl sampling in Bangladesh, 2007-2012
7. **Appendix – Table 2:** A list of the influenza A viruses detected through live bird market environmental sampling in Bangladesh, 2009-2012
8. **Appendix – Table 3:** A list of environmental surveillance sites (live bird markets), where we detected the co-presence of multiple influenza A subtypes in a pooled environmental swab sample from 2009 to 2012.
9. **References**

**Appendix - Figure 1:** Location for the four rural and an urban live bird markets for avian influenza surveillance in Bangladesh from 2007 to 2012. Duration of the site specific surveillance, surveillance type, and Influenza A and H5 prevalence from the waterfowl and environmental were illustrated in the map. The map was generated using ArcGIS version 10.4 (<http://arcgis.com/>).

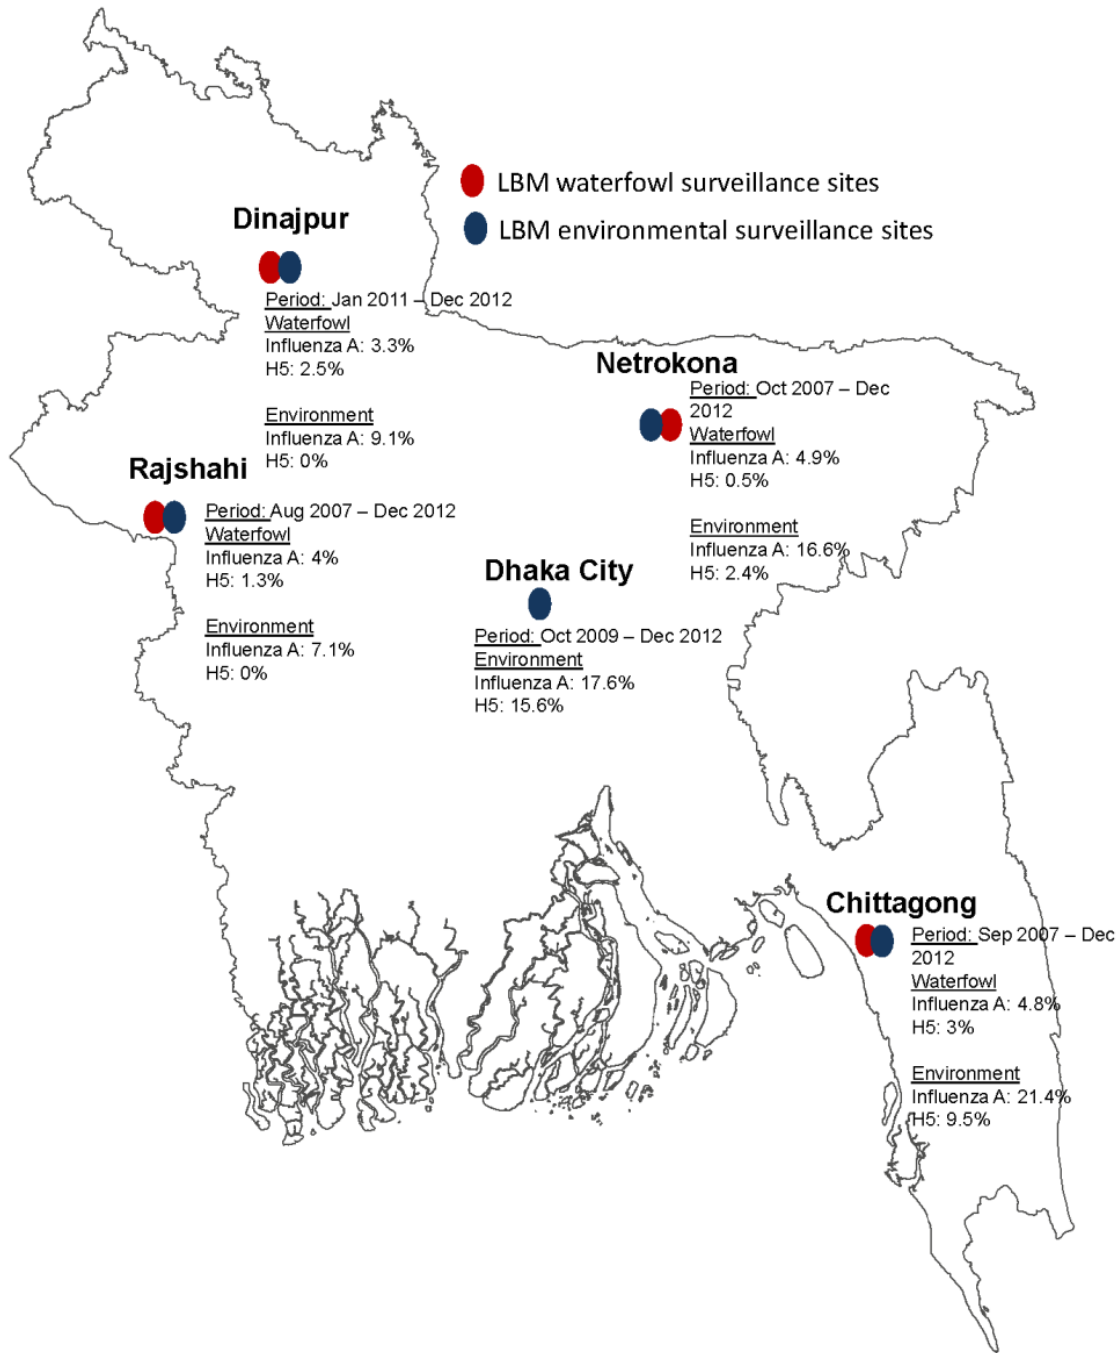

**Appendix – Figure 2:** Location for the four rural and an urban live bird markets for avian influenza surveillance in Bangladesh from 2007 to 2012. Influenza A and H5 prevalence from the waterfowl samples and the locations of H5N1 outbreaks reported to World Organization of Animal Health, 2007-2013. The map was generated using ArcGIS version 10.4 (<http://arcgis.com/>).

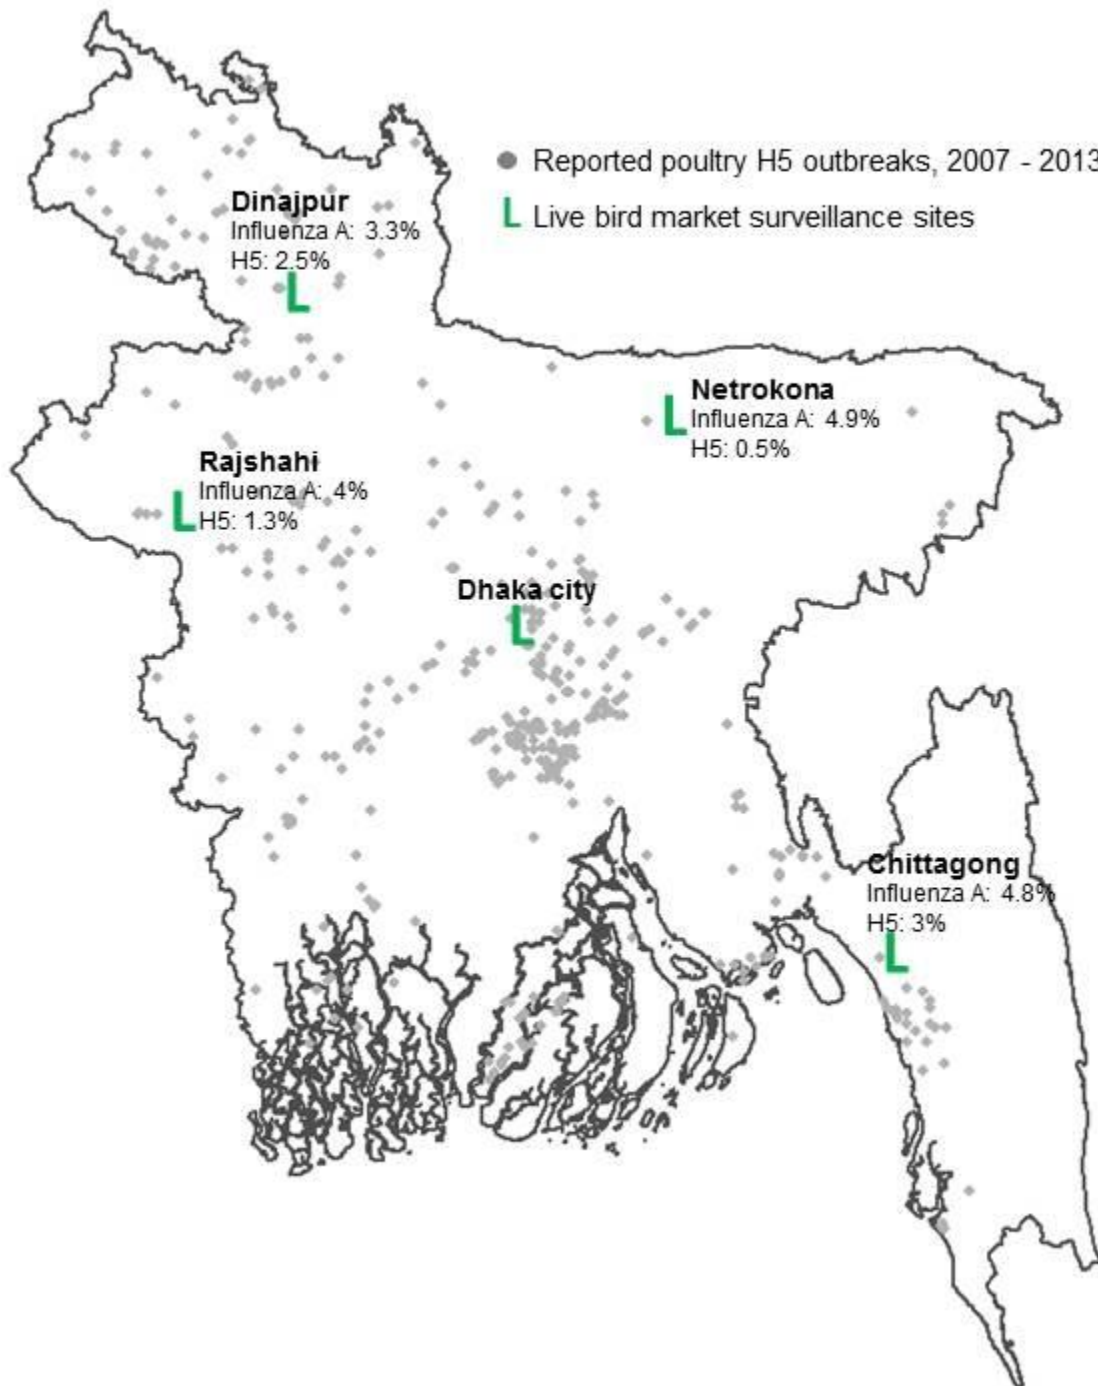

## STL Analysis

We applied Seasonal-Trend Decomposition method based on locally weighted regression, also known as STL as a filtering procedure to decompose monthly influenza A and influenza A/H5 occurrence time series data into trends, seasonal and remainder components by using a weighted polynomial regression [1, 2] to understand seasonality and trends of the influenza viruses in the poultry brought to the live bird markets.

$$Y_i = T_i + S_i + R_i$$

The equation above describes the components of the STL model, where  $Y_i$  is the element of the original time series (e.g. influenza A and H5 monthly detection data),  $T_i$  is the element for the trend variation which can be described as low frequency variation in data along with nonstationary, consistent changes in level.  $S_i$  represents the seasonal component consisting variations in data within each seasonal frequency, here the length of each cycle is 1 year. The remainder ( $R_i$ ) component consists of the data not explained by the trend and the seasonality. The gray bar at the right hand side of each category of the graph (Figure 3, Appendix: Figure 2) allows relative comparison of the magnitude of each component.

**Appendix - Figure 3:** The disintegrating results of influenza A virus detection by Seasonal-Trend Decomposition method. The filtering procedure was applied to decompose monthly influenza A detection time series data into trends, seasonal and remainder components by using a weighted polynomial regression. The Y-axis represents the periodic seasonal pattern of influenza A detection in the live bird markets and the expected trends.

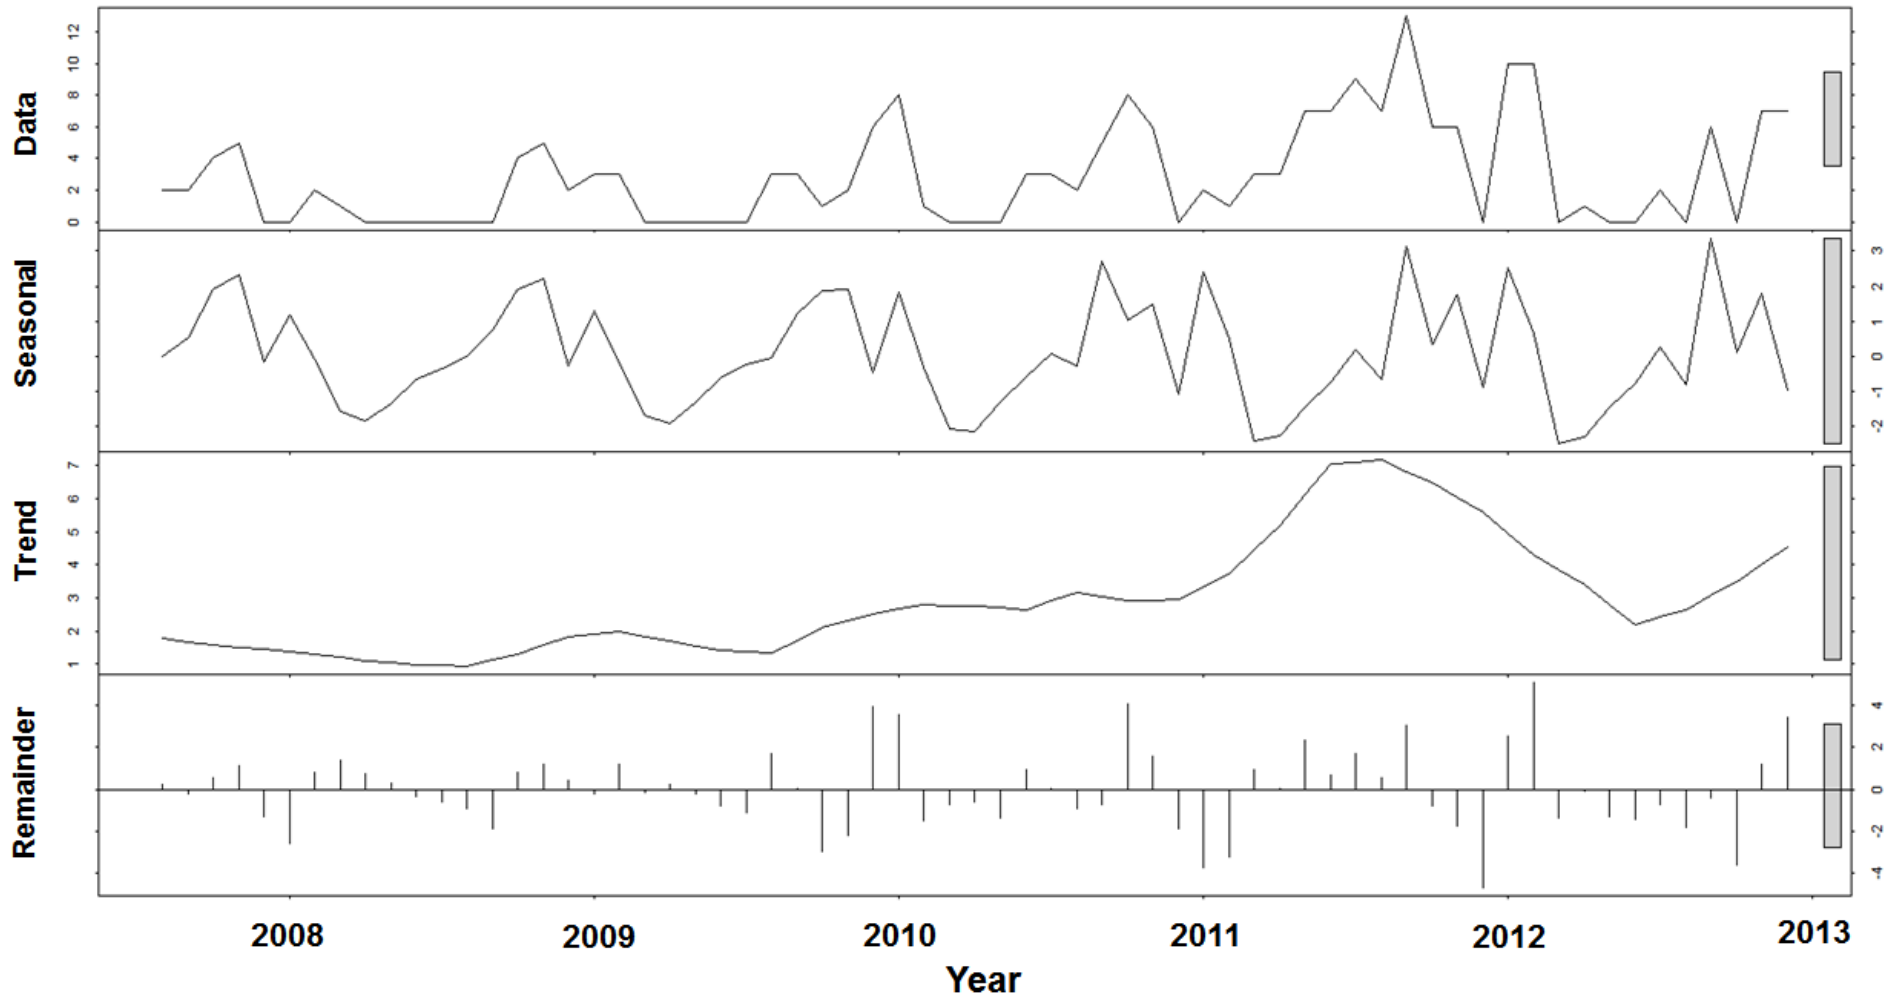

**Appendix - Figure 4:** The disintegrating results of influenza A/H5N1 virus detection by Seasonal-Trend Decomposition method. The filtering procedure was applied to decompose monthly influenza A/H5N1 detection time series data in to trends, seasonal and remainder components by using a weighted polynomial regression. The Y-axes represents the periodic seasonal pattern of influenza A/H5N1 detection in the live bird markets and the expected trends. The X-axis represents time from 2008 to 2013.

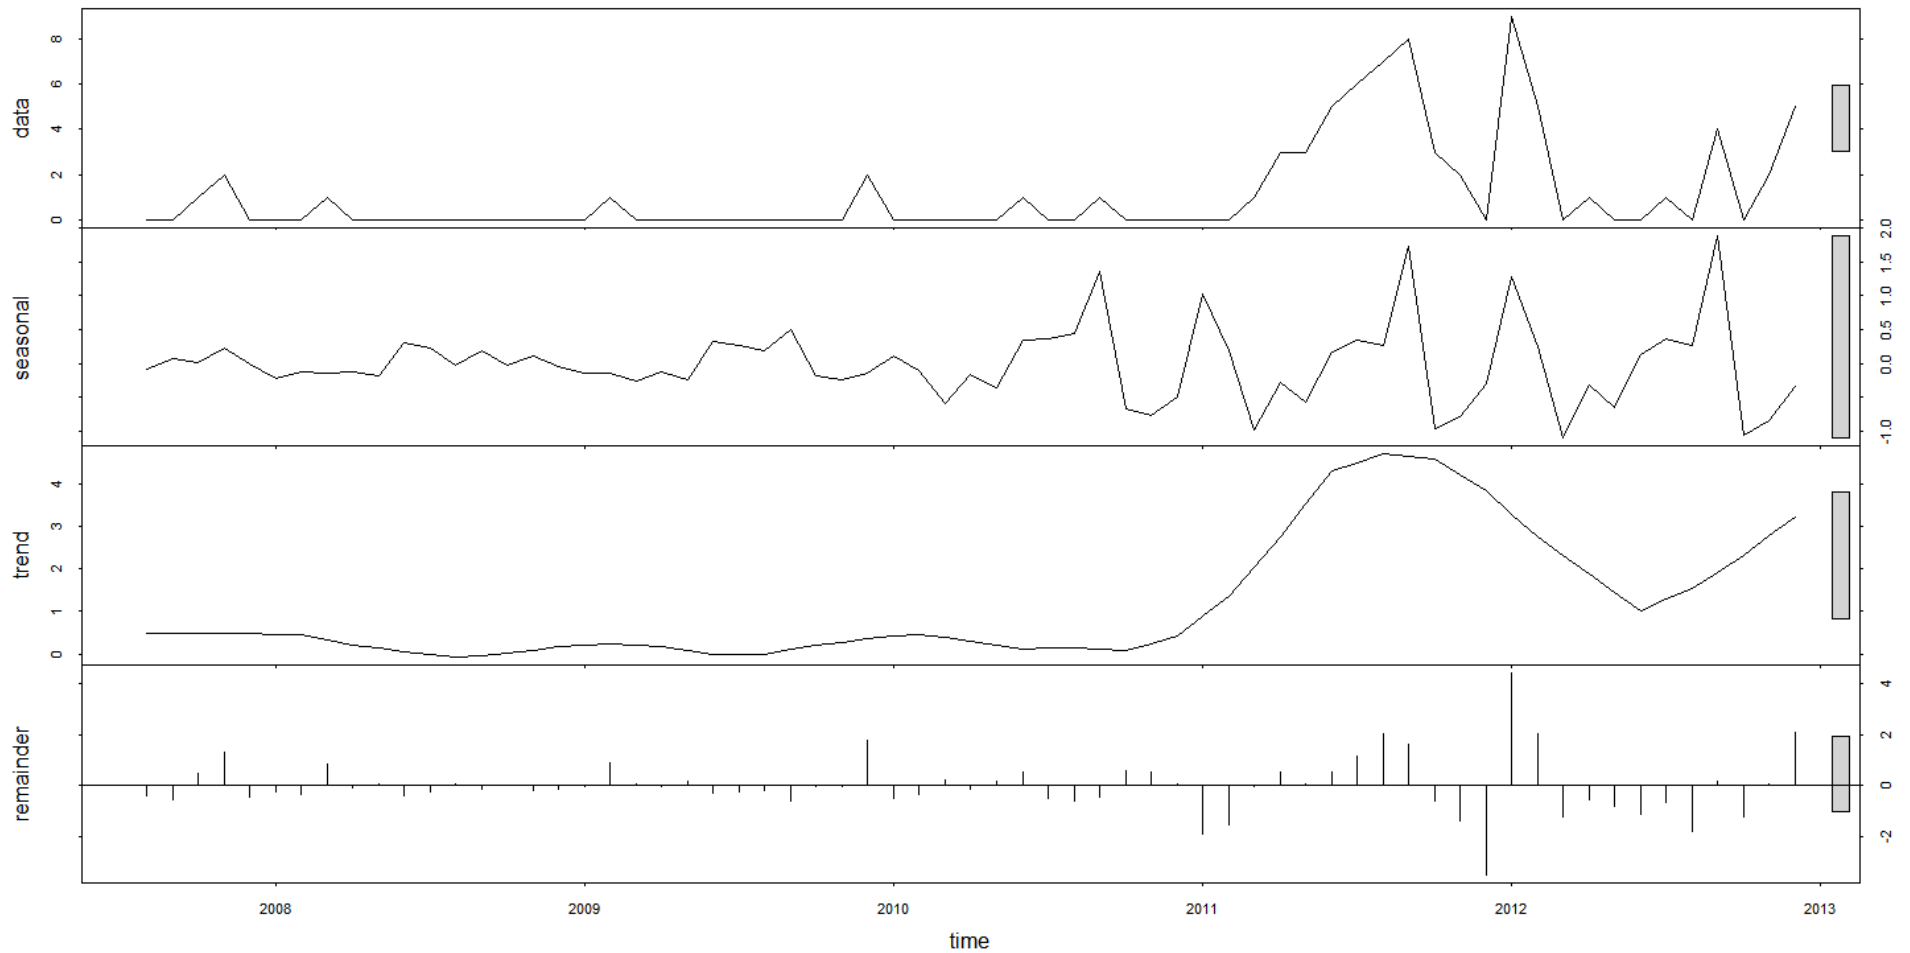

**Appendix - Table 1:** A list of the influenza A viruses (N=191) detected through live bird market waterfowl sampling in Bangladesh, 2007-2012.

| Year      | Month     | Sampled host | Sample type   | Health Status      | Influenza A subtype(clade) | Number of test positive(s) |
|-----------|-----------|--------------|---------------|--------------------|----------------------------|----------------------------|
| 2007      | August    | Duck         | Cloacal swab  | Apparently Healthy | Undetermined               | 1                          |
|           |           | Duck         | Cloacal swab  | Apparently Healthy | H9Nx                       | 1                          |
|           | September | Duck         | Cloacal swab  | Apparently Healthy | Undetermined               | 1                          |
|           |           | Duck         | Cloacal swab  | Apparently Healthy | H9Nx                       | 1                          |
|           | October   | Duck         | Cloacal swab  | Clinically ill     | H5Nx(2.2.2)                | 1                          |
|           |           | Duck         | Cloacal swab  | Apparently Healthy | H11N3                      | 2                          |
|           | November  | Duck         | Cloacal swab  | Apparently Healthy | Undetermined               | 1                          |
|           |           | Duck         | Cloacal swab  | Apparently Healthy | H5Nx                       | 1                          |
|           |           | Duck         | Cloacal swab  | Apparently Healthy | H5Nx(2.2.2)                | 1                          |
|           |           | Duck         | Tracheal swab | Apparently Healthy | Undetermined               | 1                          |
|           |           | Duck         | Cloacal swab  | Apparently Healthy | Undetermined               | 2                          |
| 2008      | February  | Duck         | Cloacal swab  | Apparently Healthy | Undetermined               | 1                          |
|           |           | Duck         | Tracheal swab | Apparently Healthy | Undetermined               | 1                          |
|           | March     | Geese        | Tracheal swab | Apparently Healthy | H5Nx(2.2.2)                | 1                          |
|           | October   | Geese        | Cloacal swab  | Apparently Healthy | H9Nx                       | 2                          |
|           |           | Duck         | Cloacal swab  | Apparently Healthy | Undetermined               | 1                          |
|           | November  | Duck         | Fecal         | Apparently Healthy | Undetermined               | 1                          |
|           |           | Duck         | Fecal         | Apparently Healthy | HxN1                       | 1                          |
|           |           | Duck         | Fecal         | Clinically ill     | H3N1                       | 1                          |
|           |           | Duck         | Fecal         | Apparently Healthy | Undetermined               | 1                          |
|           |           | Duck         | Fecal         | Apparently Healthy | H6N1                       | 1                          |
|           |           | Duck         | Cloacal swab  | Apparently Healthy | H6N1                       | 1                          |
|           | December  | Duck         | Cloacal swab  | Apparently Healthy | H4N6                       | 1                          |
|           |           | Duck         | Cloacal swab  | Apparently Healthy | Undetermined               | 1                          |
|           | 2009      | January      | Duck          | Fecal              | Clinically ill             | Undetermined               |
| Duck      |           |              | Fecal         | Apparently Healthy | Undetermined               | 1                          |
| Duck      |           |              | Fecal         | Apparently Healthy | H1N1                       | 1                          |
| February  |           | Duck         | Fecal         | Apparently Healthy | Undetermined               | 2                          |
|           |           | Duck         | Cloacal swab  | Apparently Healthy | H5Nx(2.2.2)                | 1                          |
| August    |           | Duck         | Cloacal swab  | Apparently Healthy | H9Nx                       | 1                          |
|           |           | Duck         | Cloacal swab  | Apparently Healthy | Undetermined               | 2                          |
| September |           | Duck         | Cloacal swab  | Apparently Healthy | H9Nx                       | 2                          |
|           |           | Duck         | Cloacal swab  | Apparently Healthy | Undetermined               | 1                          |
| October   |           | Duck         | Cloacal swab  | Apparently Healthy | H4N6                       | 1                          |
| November  |           | Duck         | Cloacal swab  | Apparently Healthy | H9Nx                       | 2                          |
| December  |           | Duck         | Cloacal swab  | Apparently Healthy | H3N8                       | 3                          |
|           |           | Duck         | Cloacal swab  | Apparently Healthy | H5N2                       | 1                          |
|           |           | Duck         | Cloacal swab  | Apparently Healthy | H5Nx                       | 1                          |
|           |           | Duck         | Cloacal swab  | Apparently Healthy | H11N3                      | 1                          |
| 2010      |           | January      | Duck          | Cloacal swab       | Apparently Healthy         | H1N1                       |
|           | Duck      |              | Cloacal swab  | Apparently Healthy | H1N3                       | 1                          |

|      |           |       |              |                    |                |   |
|------|-----------|-------|--------------|--------------------|----------------|---|
|      |           | Duck  | Cloacal swab | Apparently Healthy | H11N3          | 1 |
|      |           | Duck  | Cloacal swab | Apparently Healthy | HxN1           | 1 |
|      |           | Duck  | Cloacal swab | Apparently Healthy | Undetermined   | 4 |
|      | February  | Duck  | Fecal        | Apparently Healthy | H11N2          | 1 |
|      | June      | Duck  | Cloacal swab | Apparently Healthy | H5N1           | 1 |
|      |           | Duck  | Cloacal swab | Apparently Healthy | HxN1           | 1 |
|      |           | Duck  | Cloacal swab | Apparently Healthy | Undetermined   | 1 |
|      | July      | Duck  | Cloacal swab | Apparently Healthy | H1N1           | 2 |
|      |           | Duck  | Cloacal swab | Apparently Healthy | HxN1           | 1 |
|      | August    | Duck  | Cloacal swab | Apparently Healthy | HxN1           | 1 |
|      |           | Duck  | Cloacal swab | Apparently Healthy | Undetermined   | 1 |
|      | September | Duck  | Cloacal swab | Apparently Healthy | H5Nx           | 1 |
|      |           | Duck  | Cloacal swab | Apparently Healthy | H11N3          | 4 |
|      | October   | Duck  | Cloacal swab | Apparently Healthy | H4N1           | 1 |
|      |           | Duck  | Cloacal swab | Apparently Healthy | H4N2           | 2 |
|      |           | Duck  | Cloacal swab | Apparently Healthy | H4N6           | 1 |
|      |           | Duck  | Cloacal swab | Apparently Healthy | HxN1           | 2 |
|      |           | Duck  | Cloacal swab | Apparently Healthy | Undetermined   | 2 |
|      | November  | Duck  | Cloacal swab | Apparently Healthy | H3N2           | 1 |
|      |           | Duck  | Cloacal swab | Apparently Healthy | H3N6           | 2 |
|      |           | Duck  | Cloacal swab | Apparently Healthy | H4N6           | 2 |
|      |           | Duck  | Cloacal swab | Apparently Healthy | Undetermined   | 1 |
| 2011 | January   | Duck  | Cloacal swab | Apparently Healthy | H3N2           | 1 |
|      |           | Duck  | Cloacal swab | Apparently Healthy | Undetermined   | 1 |
|      | February  | Duck  | Cloacal swab | Apparently Healthy | H3N2           | 1 |
|      | March     | Duck  | Cloacal swab | Apparently Healthy | H5N1(2.3.2.1a) | 1 |
|      |           | Duck  | Cloacal swab | Apparently Healthy | Undetermined   | 2 |
|      | April     | Duck  | Cloacal swab | Apparently Healthy | H5Nx           | 3 |
|      | May       | Duck  | Cloacal swab | Apparently Healthy | H5Nx           | 2 |
|      |           | Duck  | Fecal        | Apparently Healthy | H5Nx           | 1 |
|      |           | Duck  | Cloacal swab | Apparently Healthy | Undetermined   | 4 |
|      | June      | Duck  | Cloacal swab | Apparently Healthy | H5Nx           | 5 |
|      |           | Duck  | Cloacal swab | Apparently Healthy | Undetermined   | 2 |
|      | July      | Duck  | Cloacal swab | Apparently Healthy | H5Nx           | 6 |
|      |           | Duck  | Cloacal swab | Apparently Healthy | Undetermined   | 3 |
|      | August    | Duck  | Cloacal swab | Apparently Healthy | H5Nx           | 7 |
|      | September | Duck  | Cloacal swab | Apparently Healthy | H1N2           | 1 |
|      | September | Duck  | Cloacal swab | Apparently Healthy | H5N1(2.3.2.1a) | 7 |
|      |           | Duck  | Cloacal swab | Apparently Healthy | H5N1           | 1 |
|      |           | Duck  | Cloacal swab | Apparently Healthy | Undetermined   | 4 |
|      | October   | Duck  | Cloacal swab | Apparently Healthy | H5N1(2.3.4.2)  | 2 |
|      |           | Geese | Cloacal swab | Apparently Healthy | H5N1(2.3.4.2)  | 1 |
|      |           | Duck  | Cloacal swab | Apparently Healthy | Undetermined   | 3 |
|      | November  | Duck  | Cloacal swab | Apparently Healthy | H5N1(2.3.2.1a) | 2 |
|      |           | Duck  | Cloacal swab | Apparently Healthy | Undetermined   | 4 |
| 2012 | January   | Duck  | Cloacal swab | Apparently Healthy | H5N1(2.3.2.1a) | 6 |
|      |           | Geese | Cloacal swab | Apparently Healthy | H5N1(2.3.2.1a) | 1 |



---

|           |      |              |                    |                |   |
|-----------|------|--------------|--------------------|----------------|---|
|           | Duck | Cloacal swab | Apparently Healthy | H5N1           | 3 |
|           | Duck | Cloacal swab | Apparently Healthy | Undetermined   | 1 |
| February  | Duck | Cloacal swab | Apparently Healthy | H5N1(2.3.2.1a) | 3 |
|           | Duck | Cloacal swab | Apparently Healthy | H5N1           | 1 |
|           | Duck | Cloacal swab | Apparently Healthy | H11N6          | 1 |
|           | Duck | Cloacal swab | Apparently Healthy | Undetermined   | 4 |
| April     | Duck | Cloacal swab | Apparently Healthy | H5N1(2.3.2.1a) | 1 |
| July      | Duck | Cloacal swab | Apparently Healthy | H5N1(2.3.2.1a) | 1 |
|           | Duck | Cloacal swab | Apparently Healthy | Undetermined   | 1 |
| September | Duck | Cloacal swab | Apparently Healthy | H5N1           | 4 |
|           | Duck | Cloacal swab | Apparently Healthy | Undetermined   | 2 |
| November  | Duck | Cloacal swab | Apparently Healthy | H5N1(2.3.2.1a) | 2 |
|           | Duck | Cloacal swab | Apparently Healthy | Undetermined   | 5 |
| December  | Duck | Cloacal swab | Apparently Healthy | H5N1           | 5 |
|           | Duck | Cloacal swab | Apparently Healthy | Undetermined   | 2 |

---

**Appendix – Table 2:** A list of the influenza A viruses detected through live bird market environmental sampling in Bangladesh, 2009-2012. The number of test positives represents the aggregated number of subtypes detected in each month from the live bird market environmental sampling sites.

| Year | Month | Subtype (clade) | # Test Positives | NDV co-presence |
|------|-------|-----------------|------------------|-----------------|
| 2009 | Aug   | H5Nx            | 1                | -               |
|      |       | H9Nx            | 1                | -               |
|      |       | Undetermined    | 1                | -               |
|      | Sep   | H9Nx            | 2                | -               |
|      | Oct   | H9Nx            | 5                | -               |
|      |       | Undetermined    | 2                | -               |
|      | Nov   | H5Nx            | 2                | -               |
|      |       | H9Nx            | 2                | -               |
|      | Dec   | H5Nx            | 4                | -               |
|      |       | H9Nx            | 3                | -               |
| 2010 | Jan   | H5Nx            | 2                | -               |
|      |       | H9Nx            | 5                | -               |
|      | Feb   | H5Nx            | 2                | -               |
|      |       | H9Nx            | 1                | -               |
|      | Mar   | H5Nx            | 6                | -               |
|      |       | H9Nx            | 2                | -               |
|      |       | H11N3           | 1                | -               |
|      | Apr   | H9Nx            | 5                | -               |
|      | May   | H9Nx            | 4                | -               |
|      | Jun   | H5Nx            | 1                | -               |
|      |       | H9Nx            | 2                | -               |
|      |       | Undetermined    | 2                | -               |
|      | Jul   | H5Nx            | 2                | -               |
|      |       | H9N2            | 1                | -               |
|      |       | H9Nx            | 2                | -               |
|      |       | Undetermined    | 2                | -               |
|      | Aug   | H5Nx            | 1                | -               |
|      |       | H9              | 4                | -               |
|      | Sep   | H7N9            | 1                | -               |
|      |       | H9Nx            | 2                | -               |
|      |       | Undetermined    | 3                | -               |
|      | Oct   | H9N2            | 1                | -               |
|      |       | H9Nx            | 3                | -               |
|      |       | Undetermined    | 1                | -               |
|      | Nov   | H5Nx            | 1                | -               |
|      |       | H9Nx            | 3                | -               |
|      |       | Undetermined    | 1                | -               |
|      | Dec   | H5Nx            | 4                | -               |
|      |       | H9N2            | 1                | -               |

|      |      |                |   |     |
|------|------|----------------|---|-----|
|      |      | H9Nx           | 1 | -   |
|      |      | Undetermined   | 1 | -   |
| 2011 | Jan  | H9Nx           | 1 | -   |
|      |      | HxN1           | 1 | -   |
|      | Feb  | H5N1(2.2.2)    | 3 | Yes |
|      | Mar  | H9N1           | 1 | -   |
|      | Apr  | H3N2           | 1 | -   |
|      | May  | H5N1(2.3.2)    | 1 | Yes |
|      |      | H5Nx           | 4 | Yes |
|      |      | H9Nx           | 2 | -   |
|      |      | Undetermined   | 1 | -   |
|      | Jun  | H5Nx           | 5 | Yes |
|      |      | H9Nx           | 1 | -   |
|      |      | Undetermined   | 1 | -   |
|      | Jul  | H5Nx           | 5 | -   |
|      |      | H9Nx           | 1 | -   |
|      | Aug  | H5Nx           | 5 | Yes |
|      |      | H9Nx           | 1 | -   |
|      |      | Undetermined   | 1 | -   |
|      | Sep  | H5Nx(2.3.2.1a) | 1 | -   |
|      |      | Undetermined   | 3 | -   |
|      | Oct  | H5Nx           | 3 | -   |
|      |      | Undetermined   | 2 | -   |
|      | Nov  | H5Nx           | 1 | -   |
|      |      | Undetermined   | 2 | -   |
|      | Dec  | H5Nx(2.3.2.1a) | 5 | Yes |
|      |      | H5Nx           | 2 | -   |
|      |      | Undetermined   | 5 | -   |
| 2012 | Jan  | H5Nx(2.3.2.1a) | 1 | Yes |
|      | Feb  | H5Nx(2.3.2.1a) | 2 | Yes |
|      |      | H5Nx           | 1 | -   |
|      |      | Undetermined   | 1 | -   |
|      | Mar  | H5Nx(2.3.2.1a) | 1 | Yes |
|      |      | H5Nx           | 1 | -   |
|      |      | H7N9           | 1 | -   |
|      | Apr  | H5Nx           | 2 | -   |
|      |      | Undetermined   | 1 | -   |
|      | May  | Undetermined   | 1 | -   |
|      | June | -              | - | -   |
|      | July | H5Nx           | 1 | -   |
|      | Aug  | -              | - | -   |
|      |      | H5Nx           | 1 | -   |
|      |      | H9Nx           | 1 | -   |
|      |      | Undetermined   | 3 | Yes |
|      | Sep  | H5Nx           | 3 | -   |

**Appendix – Table 3:** A list of environmental surveillance sites (live bird markets), where we detected the co-presence of multiple influenza A subtypes in pooled environmental swab samples from 2009 to 2012. We only detected influenza A H5Nx and H9Nx virus co-presence, all of which were during 2011. We also detected co-presence of Newcastle disease virus RNA in all these samples.

| <b>Year</b> | <b>Month</b> | <b>Live bird market name</b>                                                                                                                                                    |
|-------------|--------------|---------------------------------------------------------------------------------------------------------------------------------------------------------------------------------|
| 2011        | May          | Shantinagar Kacha Bazar, Dhaka city<br>Mohammadpur Townhall City Corporation Market, Dhaka city                                                                                 |
|             | Jun          | Mohammadpur Townhall City Corporation Market, Dhaka city<br>Kaptanbazar Market, Dhaka city                                                                                      |
|             | Jul          | Mohammadpur Townhall City Corporation Market, Dhaka city<br>Nawab Yusuf Ali Kacha Bazar, Dhaka city<br>Hazaribag Kacha Bazar, Dhaka city<br>Mohakhali Kancha Market, Dhaka city |
|             | Aug          | Moulovibazar Kacha Bazar, Dhaka city<br>Rampura kacha market, Dhaka city<br>Mohammadpur Townhall City Corporation Market, Dhaka city                                            |

## REFERENCES

1. Cleveland, R.B., W.S. Cleveland, and J.E. McRae, *STL: A seasonal-trend decomposition procedure based on loess*. J Official Stat, 1990. **6**: p. 3-73.
2. Ke, G., et al., *Epidemiological analysis of hemorrhagic fever with renal syndrome in China with the seasonal-trend decomposition method and the exponential smoothing model*. Sci Rep, 2016. **6**: p. 39350.
